# Supplementary material for: Explicit simulation of chemical composition, size distribution and cloud condensation nuclei of secondary organic aerosol from α-pinene ozonolysis
Source: Copernicus journal article supplement (doi:10.5194/egusphere-2025-4393), 2025-09-30
Supplement: Supplementary file 1 [file egusphere-2025-4393-supplement.pdf]

# Supplement of

## Explicit simulation of chemical composition, size distribution and cloud condensation nuclei of secondary organic aerosol from $\alpha$ -pinene ozonolysis

5 Zhen Song<sup>1,2,3,4</sup>, Chenqi Zhang<sup>1</sup>, Hongru Shen<sup>1,†</sup>, Hao Ma<sup>1</sup>, Iida Pullinen<sup>6,‡</sup>, Defeng Zhao<sup>1,3,4,5</sup>  
<sup>1</sup>Department of Atmospheric and Oceanic Sciences & Institute of Atmospheric Sciences, Fudan University, Shanghai, China  
<sup>2</sup>Shanghai Frontiers Science Center of Atmosphere-Ocean Interaction, Fudan University, Shanghai, 200438, China  
<sup>3</sup>Shanghai Key Laboratory of Ocean-land-atmosphere Boundary Dynamics and Climate Change, Fudan University, Shanghai, 200438, China  
10 <sup>4</sup>National Observations and Research Station for Wetland Ecosystems of the Yangtze Estuary, Fudan University, Shanghai, 200438, China  
<sup>5</sup>Institute of Eco-Chongming (IEC), 1050 Baozhen, Lühua Town, Chongming District, Shanghai 202151, China  
<sup>6</sup>Institute of Energy and Climate Research, IEK-8: Troposphere, Forschungszentrum Jülich, Jülich, Germany  
<sup>†</sup>Present address: Department of Chemical Engineering and Applied Chemistry/Department of Chemistry, University of  
15 Toronto, Toronto, Ontario M5S 3E5, Canada  
<sup>‡</sup> Present address: Department of Applied Physics, University of Eastern Finland, Kuopio, 70210, Finland

Correspondence to: Defeng Zhao ([dfzhao@fudan.edu.cn](mailto:dfzhao@fudan.edu.cn))

### Contents of this file

Figures S1 to S13 and Table S1.

20

**Table S1: The simulated hygroscopicity parameter ( $\kappa$ ) of SOA calculated by different chemical composition and corresponding particle size (nm).**

| Particle size (nm) | $\kappa$ |
|--------------------|----------|
| 50.6               | 0.179    |
| 63.0               | 0.178    |
| 84.8               | 0.177    |

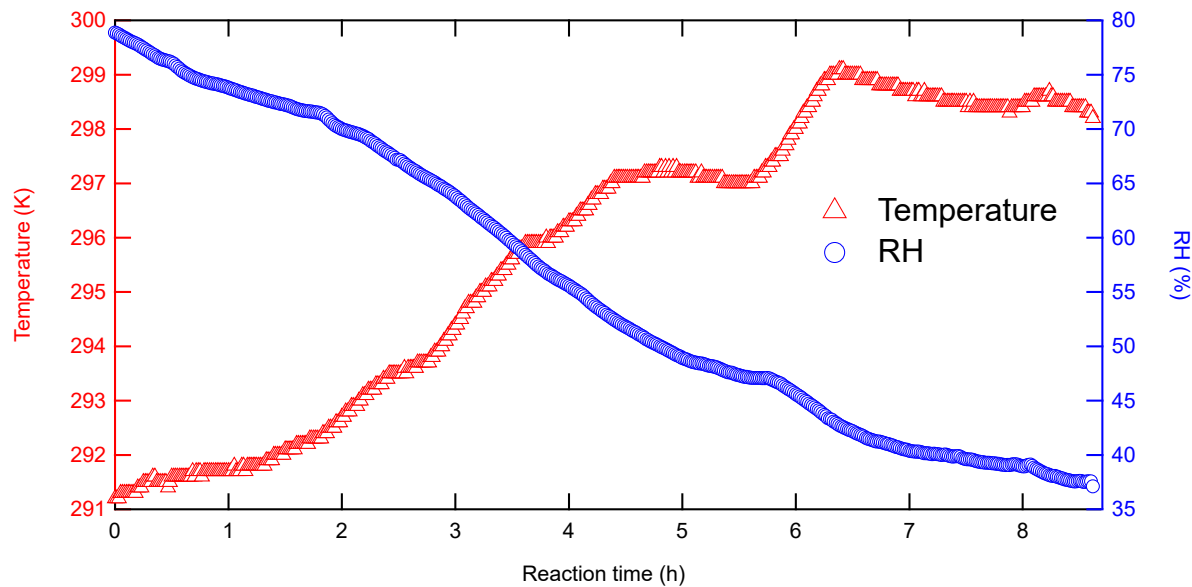

25 **Figure S1:** The time evolution of measured temperature (Unit: K) and relative humidity (RH; %) during the experiment of  $\alpha$ -pinene ozonolysis in the dark.

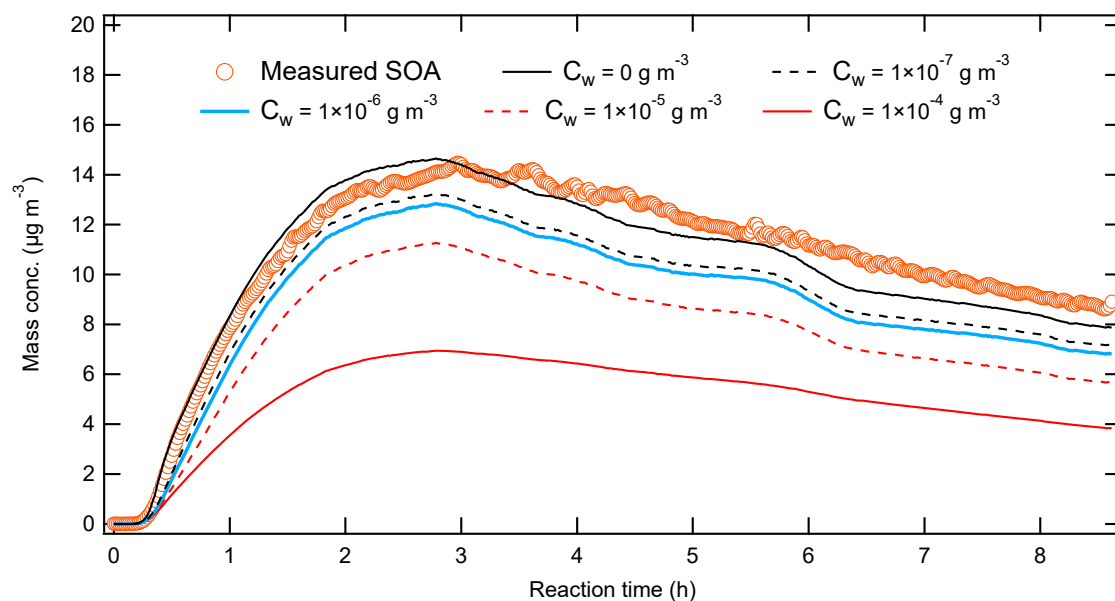

**Figure S2:** The sensitivity of SOA mass concentration to parameter  $C_w$  which represents effective absorbing wall mass concentration ( $\text{g m}^{-3}$ ).

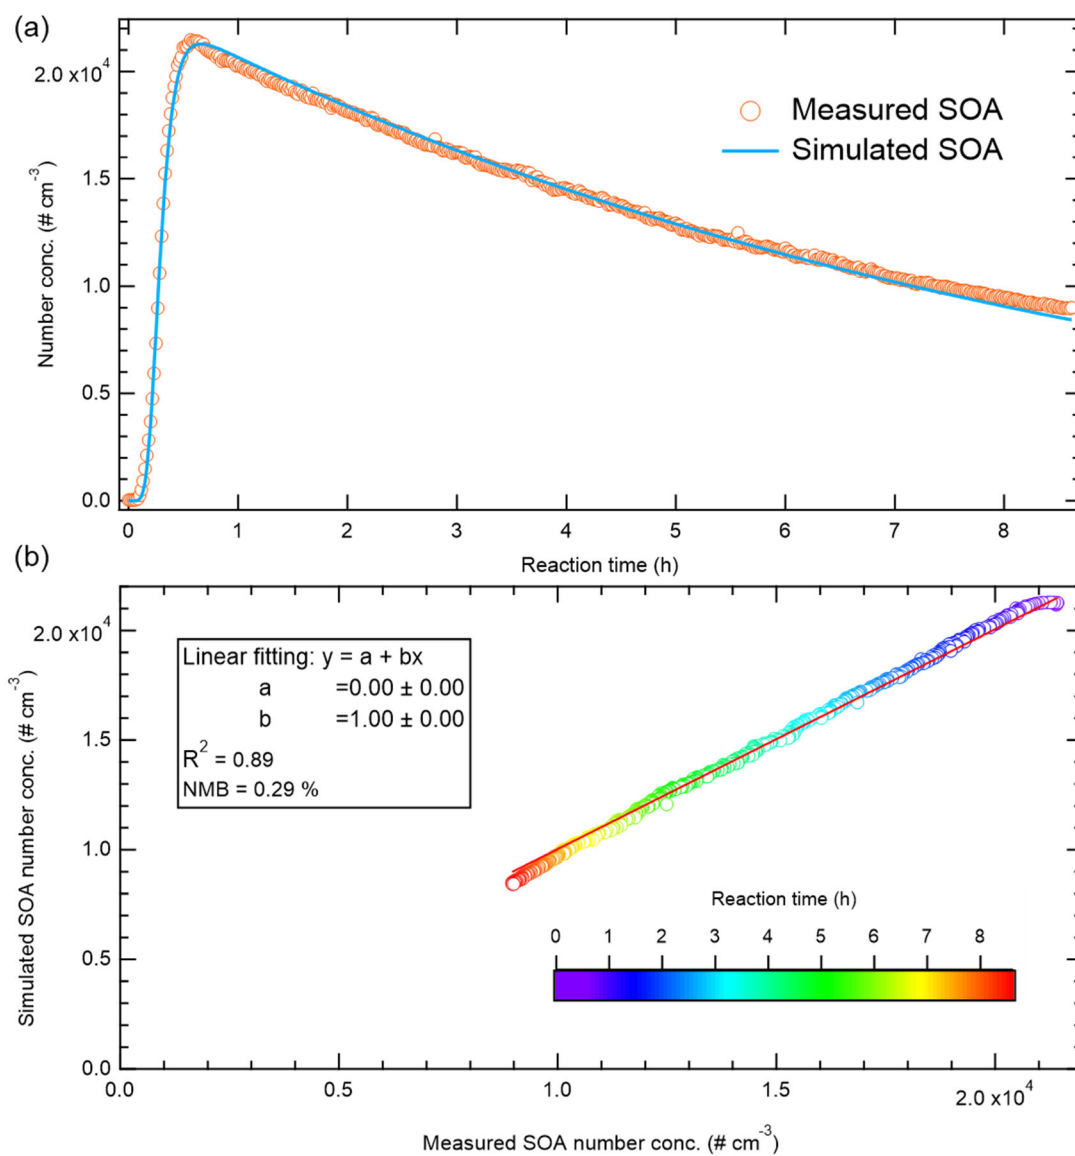

35

Figure S3: (a) Simulated (line) and measured (circles) SOA number concentrations ( $\# \text{ cm}^{-3}$ ) when setting nucleation parameters. (b) Scatter plot of measured versus simulated SOA number concentrations, with a linear fit (red line). The coefficients  $a$  and  $b$  represent the intercept and slope, respectively, and  $R^2$  denotes the correlation coefficient. Colors indicate the reaction time of the experiment. Note that the linear fitting through the origin, and NMB refers to normalized mean bias. Scatters from the initial 0.57 hours were excluded, as the number concentration during this period was fitted to CPC measurements and assumed to match measurements perfectly. Note that the coagulation is excluded.

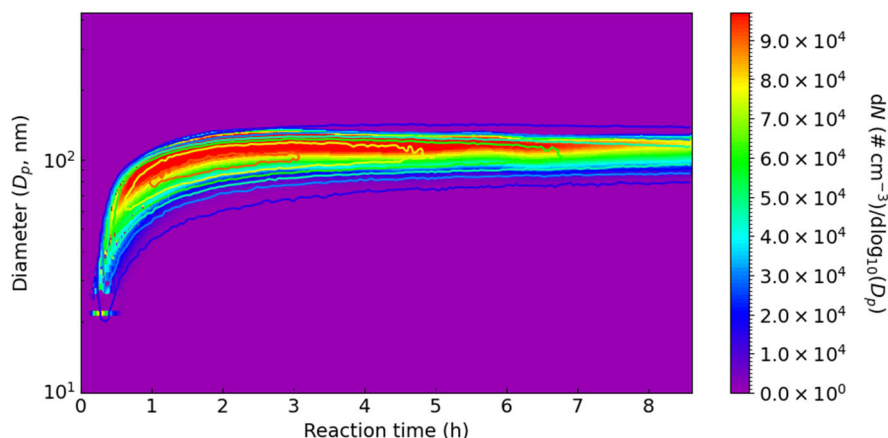

Figure S4: The time evolution of number size distributions ( $dN/d\log_{10}D_p$ ) of measured (contour lines) and simulated (shaded areas) SOA when setting nucleation parameters. Note that the coagulation is excluded.

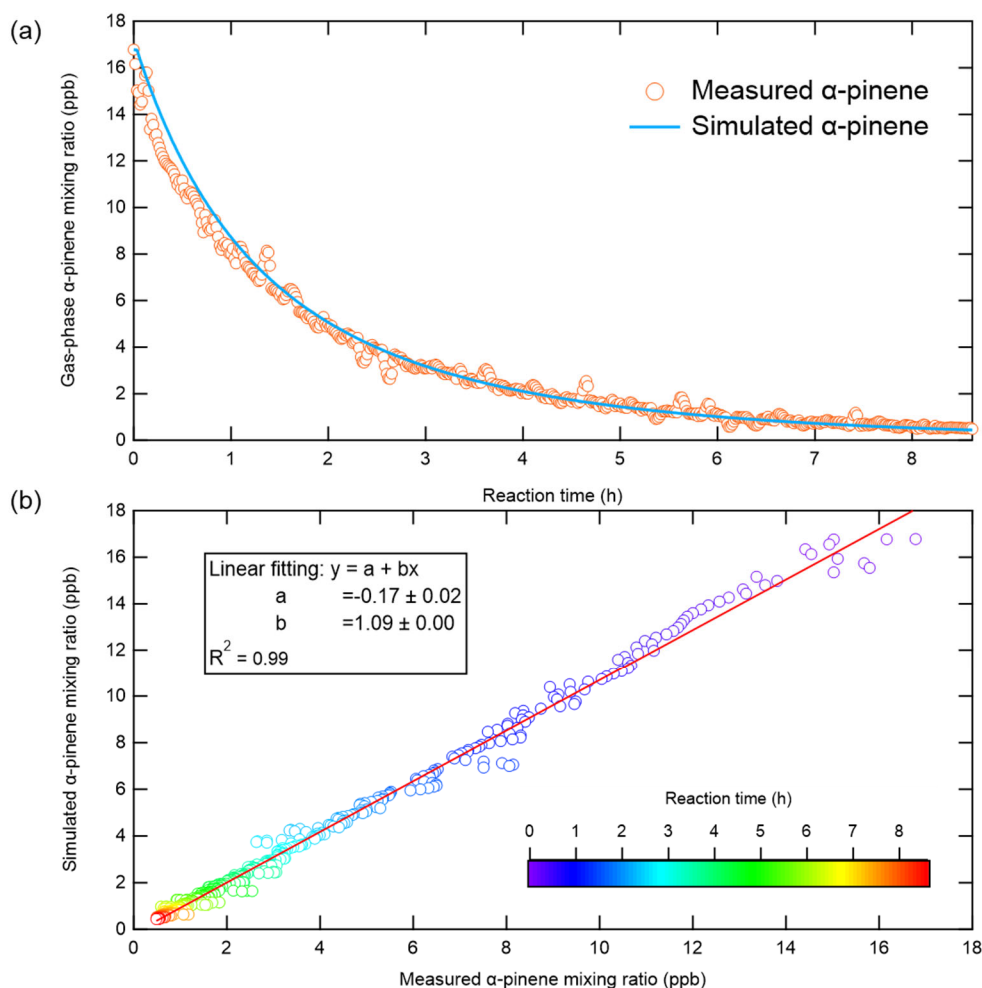

40

Figure S5: (a) The time evolution of the measured (circles) and simulated (line) gas-phase  $\alpha$ -pinene mixing ratio (ppb). (b) Scatter plot of measured versus simulated  $\alpha$ -pinene concentrations, with a linear fit (red line). The coefficients  $a$  and  $b$  represent the intercept and slope, respectively, and  $R^2$  denotes the correlation coefficient. Colors indicate the reaction time of the experiment.

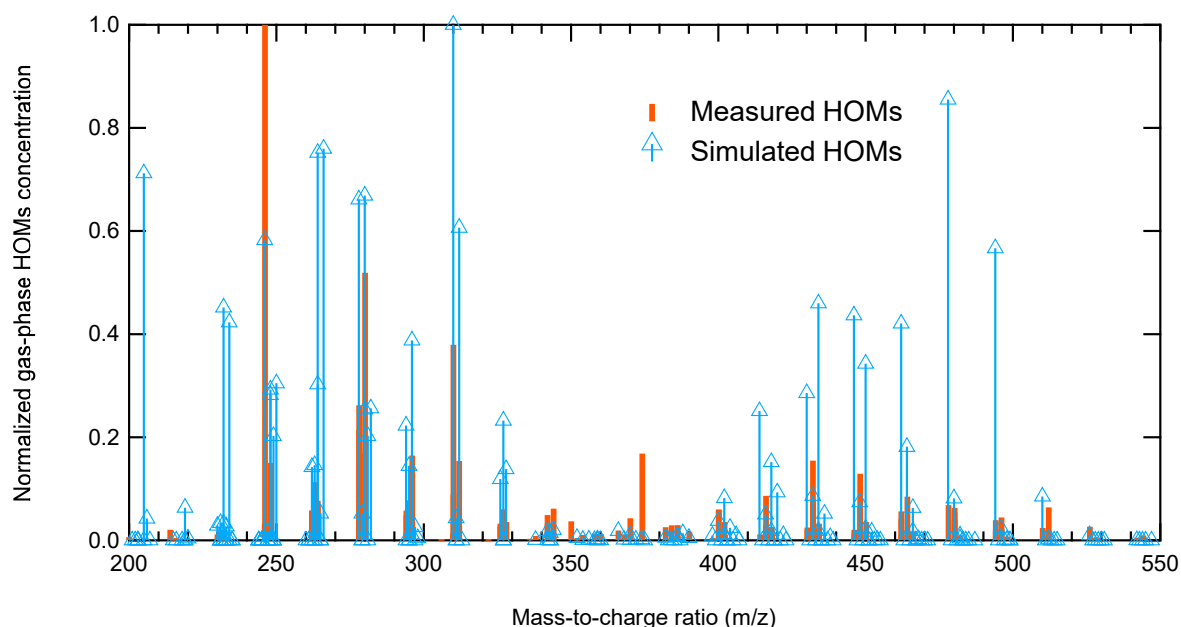

45 **Figure S6: Measured and simulated gas-phase HOMs mass spectra averaged over the first 10 minutes of experiment, during which gas-phase HOMs were rapidly accumulated and particle-phase concentrations were low.**

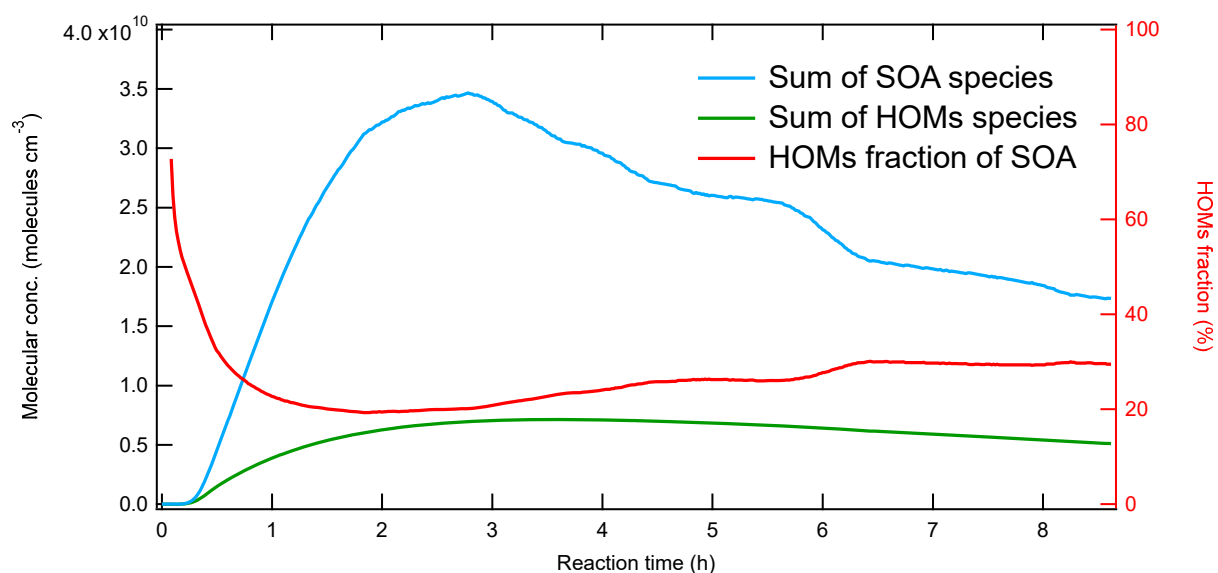

**Figure S7: The time evolution of total molecular concentrations (molecules cm<sup>-3</sup>) of simulated SOA and HOMs species, and HOMs fraction (%) of SOA.**

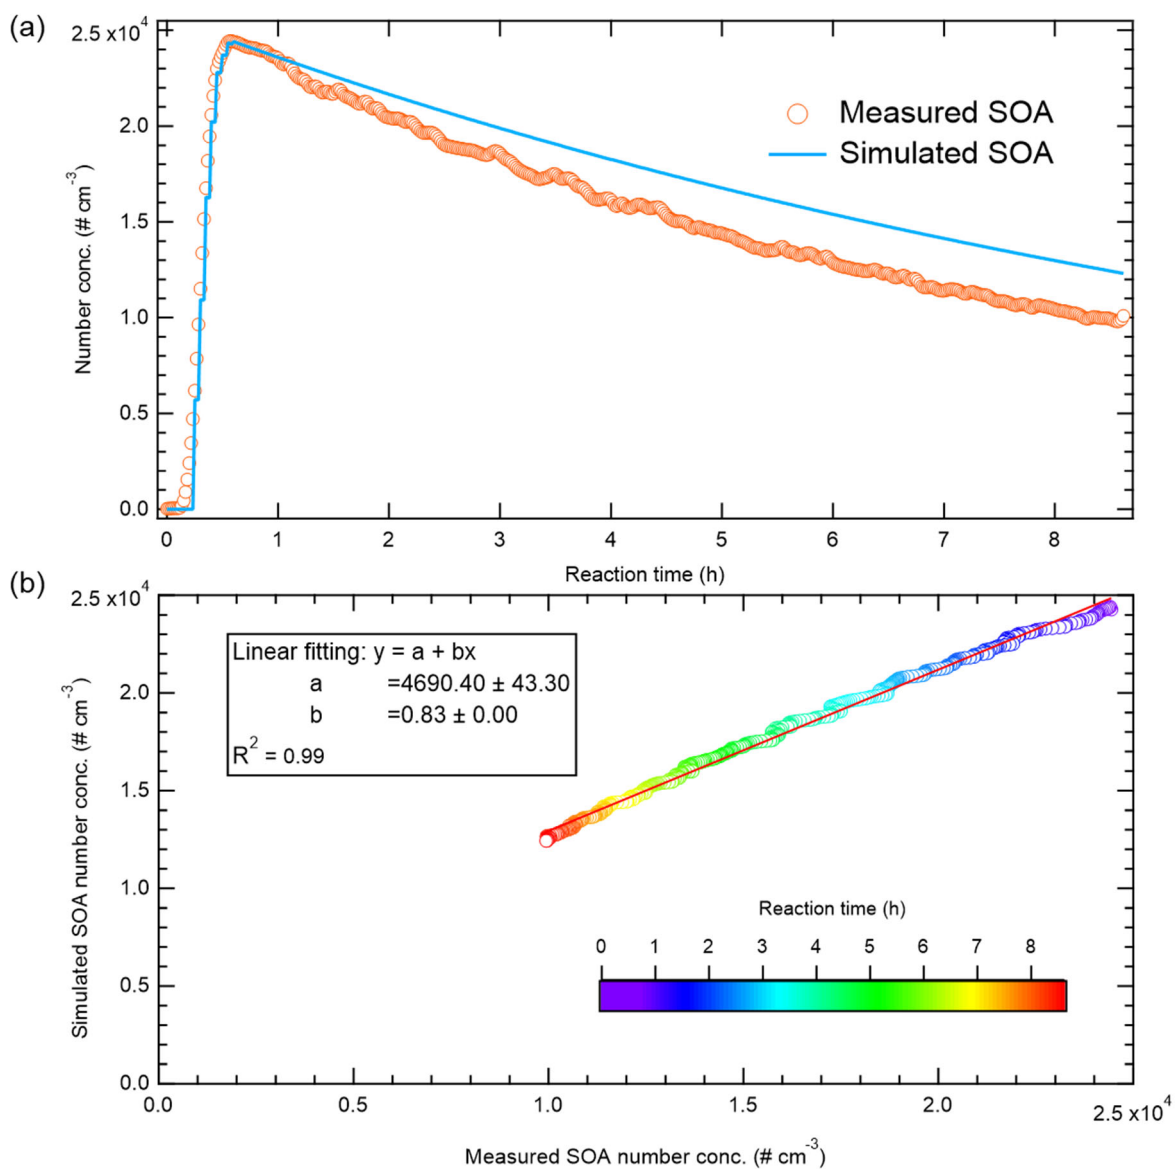

**Figure S8:** (a) Simulated (line) and measured (circles) SOA number concentrations ( $\# \text{ cm}^{-3}$ ) when constraining size distribution of seed particle and not considering coagulation. (b) Scatter plot of measured versus simulated SOA number concentrations, with a linear fit (red line). Scatters from the initial 0.6 hours were excluded, as the number concentration during this period was fitted to SMPS measurements.

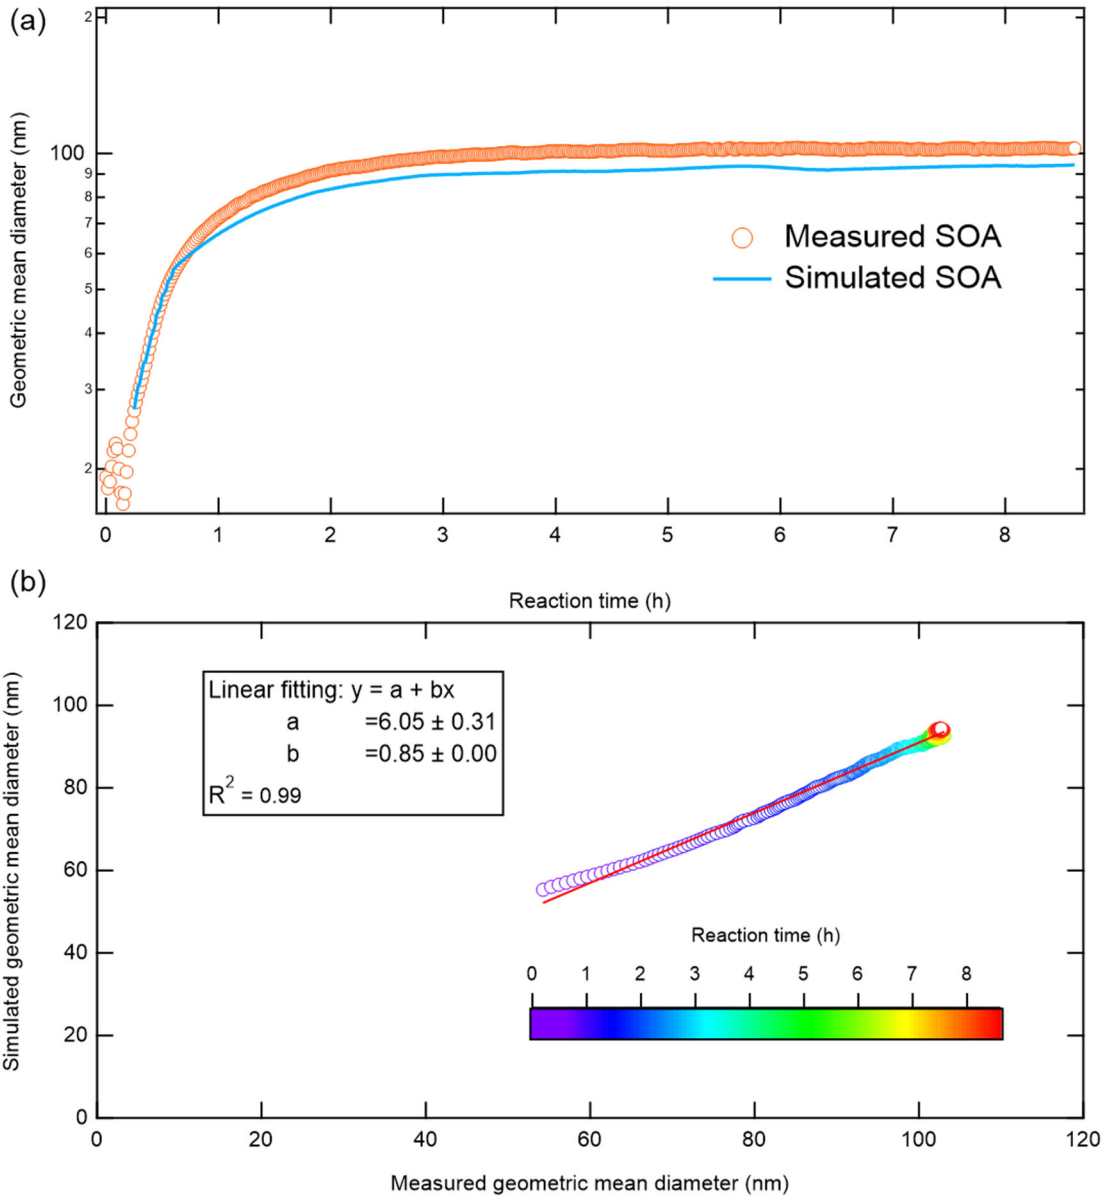

Figure S9: (a-b) Same as Fig. S8, but for geometric mean diameter (nm) of SOA. Note that the coagulation is not considered, and scatters from the initial 0.6 hours were excluded as particle size distribution during this period was fitted to SMPS measurements.

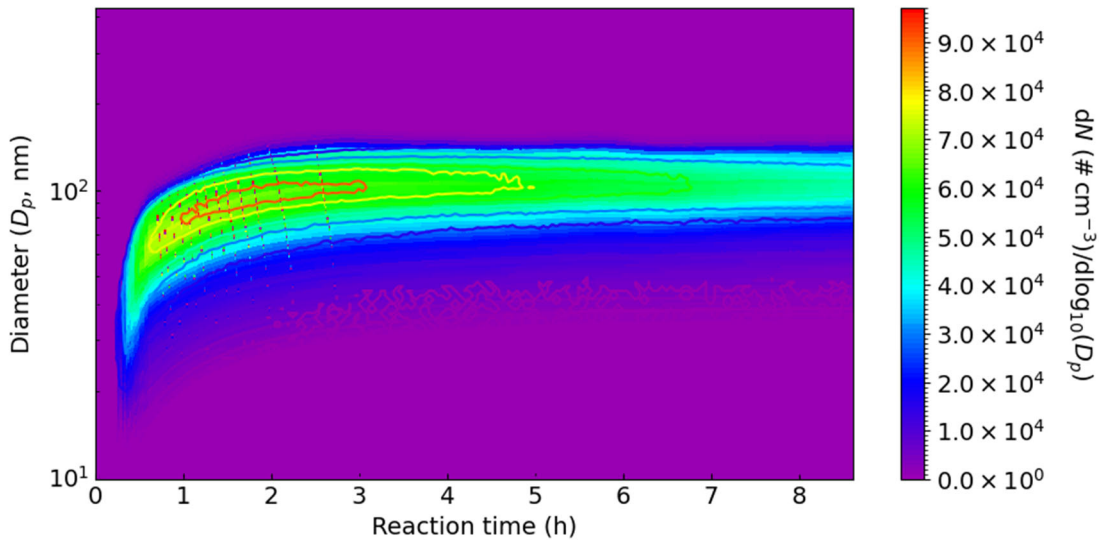

Figure S10: The time evolution of number size distributions ( $dN/d\log_{10}D_p$ ) of measured (contour lines) and simulated (shaded areas) SOA in the case of not considering coagulation.

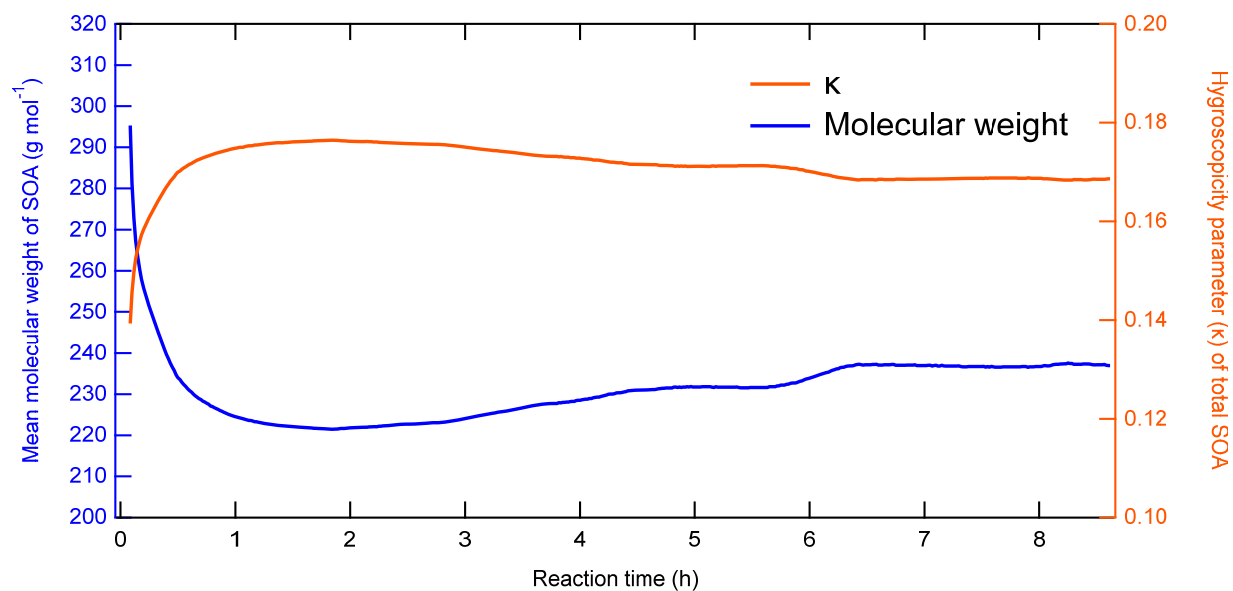

Figure S11: The time evolution of mean molecular weight and hygroscopicity parameter ( $\kappa$ ) of simulated SOA.

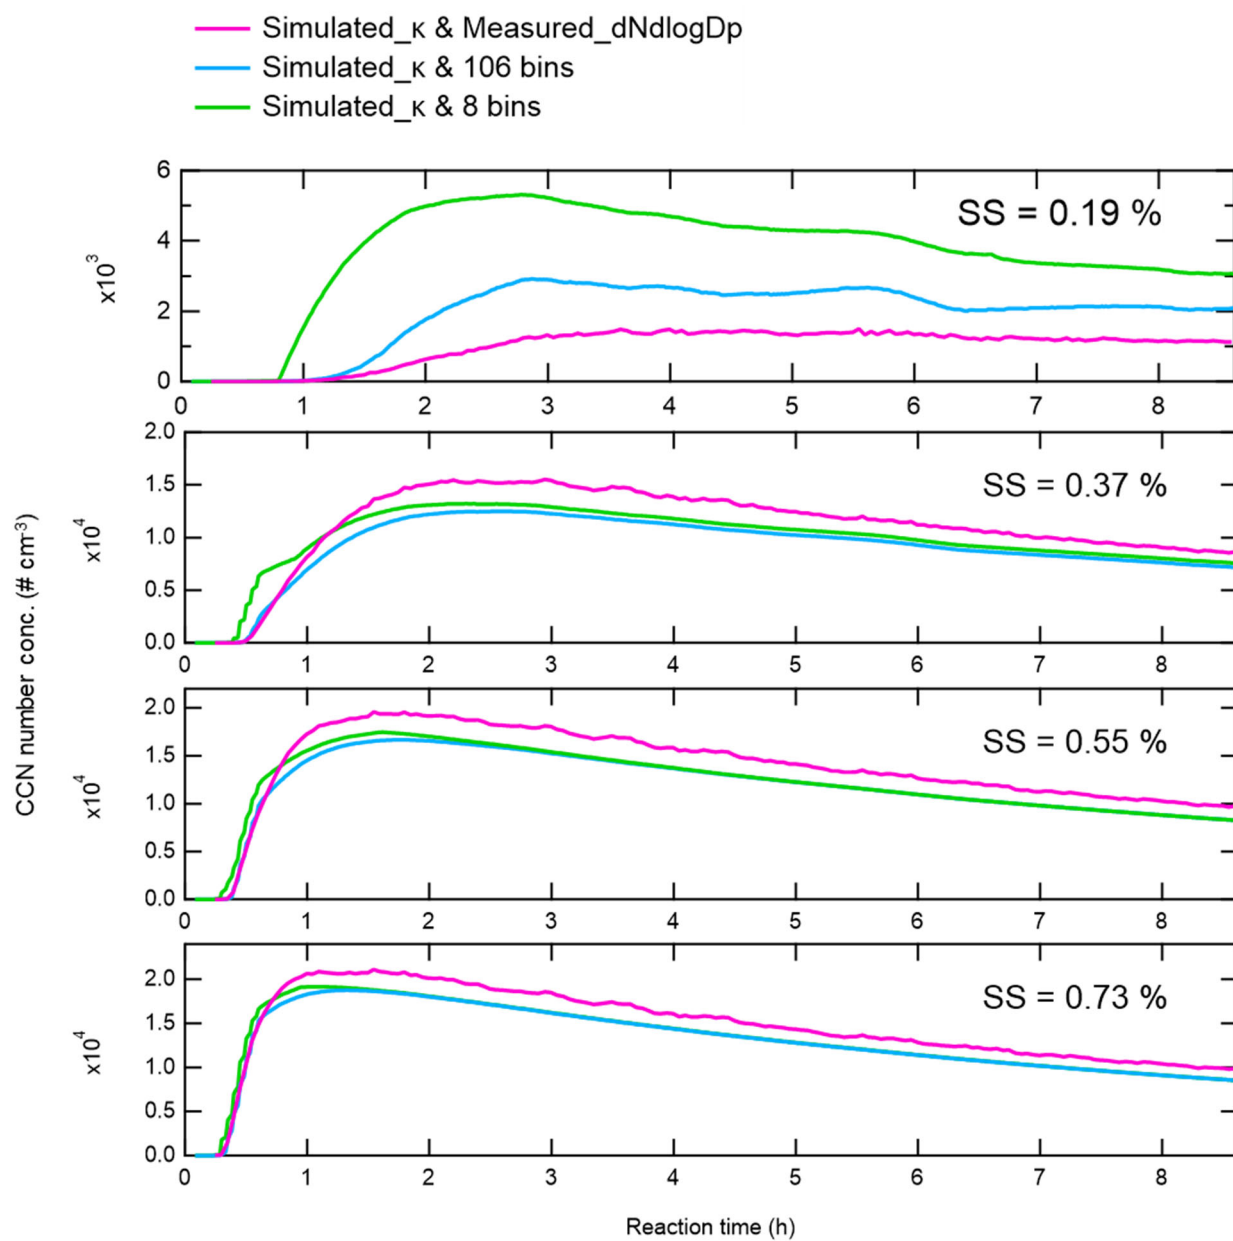

65 Figure S12: (a-d) The CCN number concentrations ( $\# \text{ cm}^{-3}$ ) at different SS based on simulated  $\kappa$  by UManSysProp and three kinds of particle number size distributions, including measurement (purple line), and simulation of 106 (blue line) and 8 (green line) size bins settings.

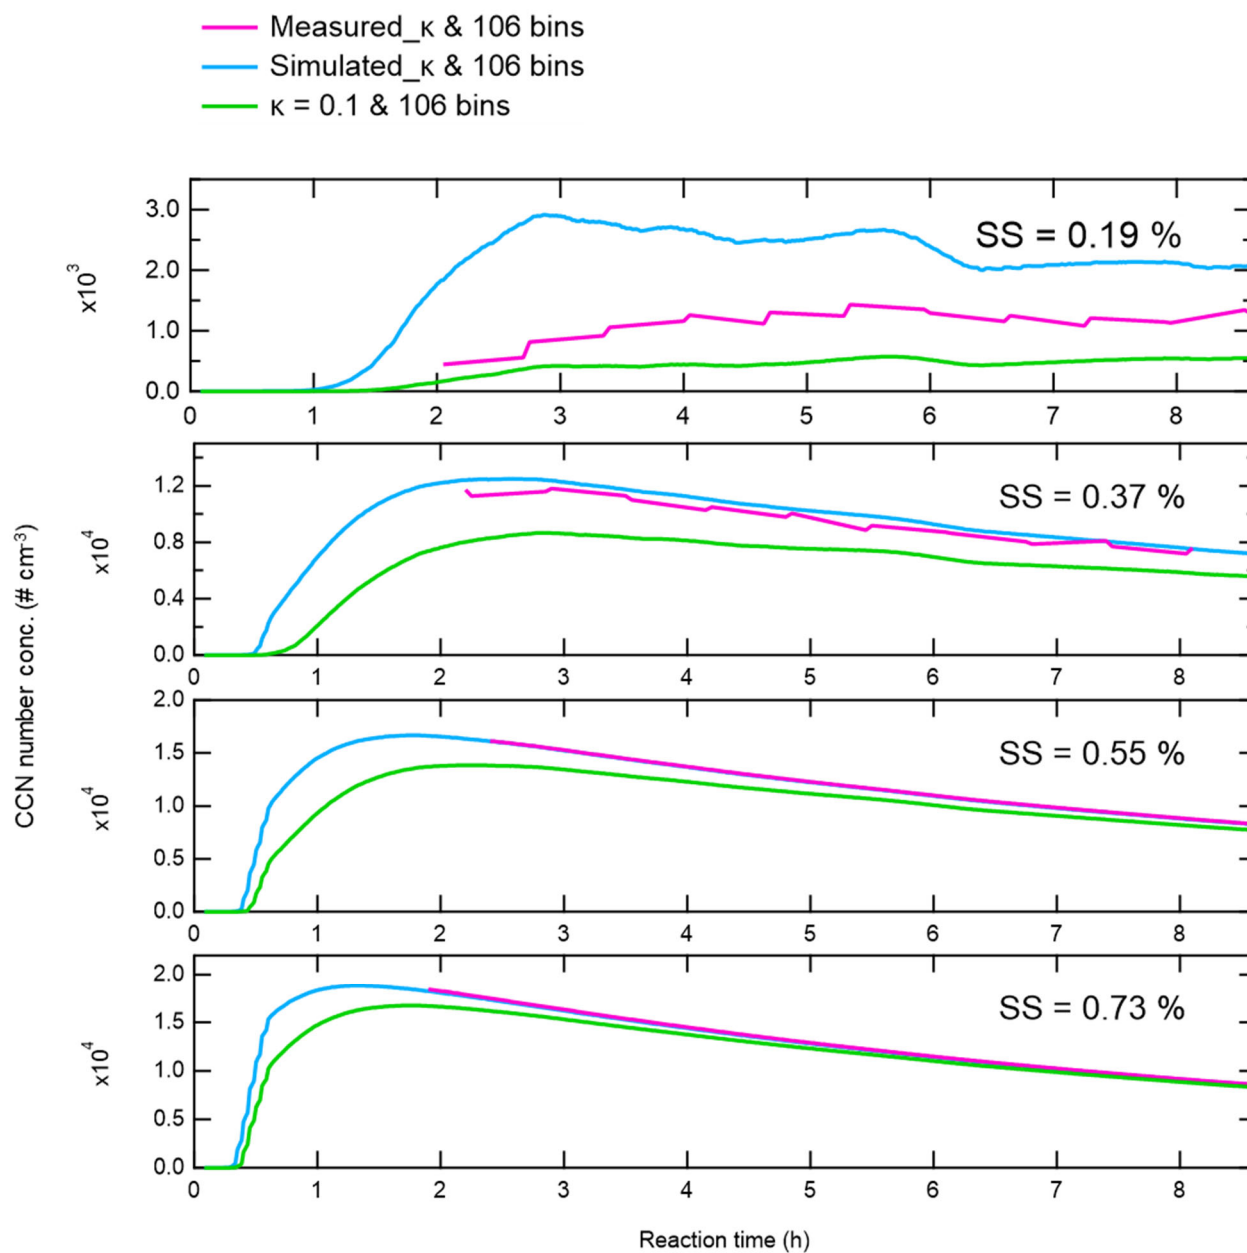

70 Figure S13: (a-d) The CCN number concentrations ( $\# \text{ cm}^{-3}$ ) at different SS based on simulated particle number size distribution of 106 size bins setting and three kinds of  $\kappa$ , including measurement (purple line), calculation of UManSysProp (blue line), and a fixed value (0.1) (green line).
